# Supplementary material for: Central Role of Dendritic Cells in Pulmonary Arterial Hypertension in Human and Mice
Source: PubMed Central journal article supplement (PMC7916474; doi:10.3390/ijms22041756), 2021-02-10
Supplement: ijms-22-01756-s001.pdf [file ijms-22-01756-s001.pdf]

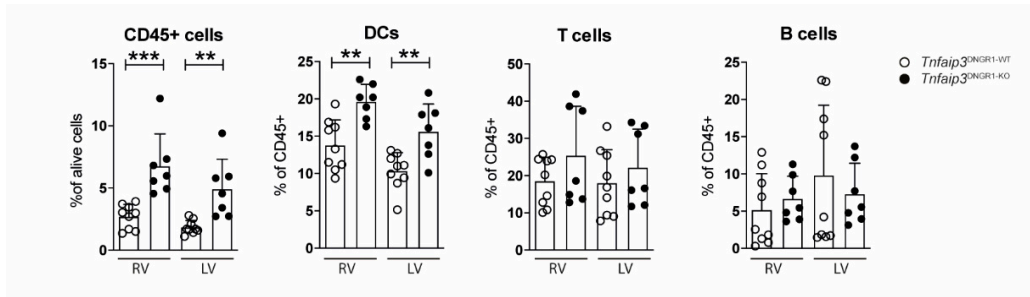

**Supplementary Figure S1.** Flow cytometry analysis in hearts of 31-week-old *Tnfaip3*<sup>DNGR1-KO</sup> mice shows increased proportions of CD45+ cells and DCs, both in right and left ventricle. Flow cytometry analysis for CD45+ cells (alive, CD45+), DCs (CD3-/CD19-, MHC-II+CD11c+), T cells (CD3+) and B cells (CD19+) in separately measured right ventricle (RV) and left ventricle (LV) cell suspensions from hearts of *Tnfaip3*<sup>DNGR1-WT/KO</sup> mice. Results are presented as mean values + standard deviation of 7-9 mice per group. \**P* < 0.05, \*\**P* < 0.01, \*\*\**P* < 0.001.

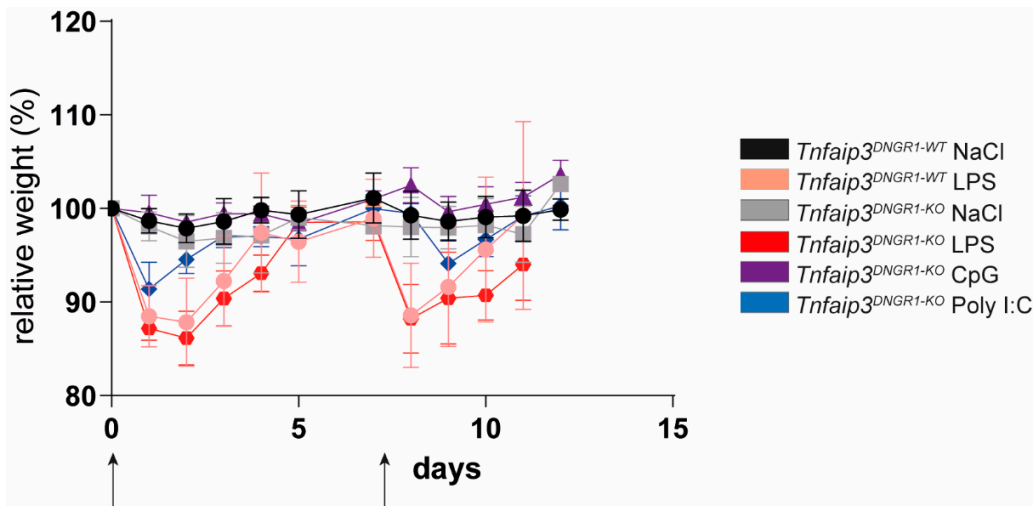

**Supplementary Figure S2.** Weight curve of TLR-exposed WT and *Tnfaip3*<sup>DNGR1-KO</sup> mice. Weight curve of WT and *Tnfaip3*<sup>DNGR1-KO</sup> mice, exposed to TLR4 ligand lipopolysaccharide (LPS), TLR3 ligand polyinosinic-polycytidylic acid (Poly I:C) or TLR9 ligand CpG. Arrows indicate moments of i.t. TLR exposure. For each mouse the weight at day 0 was set to 100%. Data are shown as mean values + standard deviations from 5-10 mice per group.

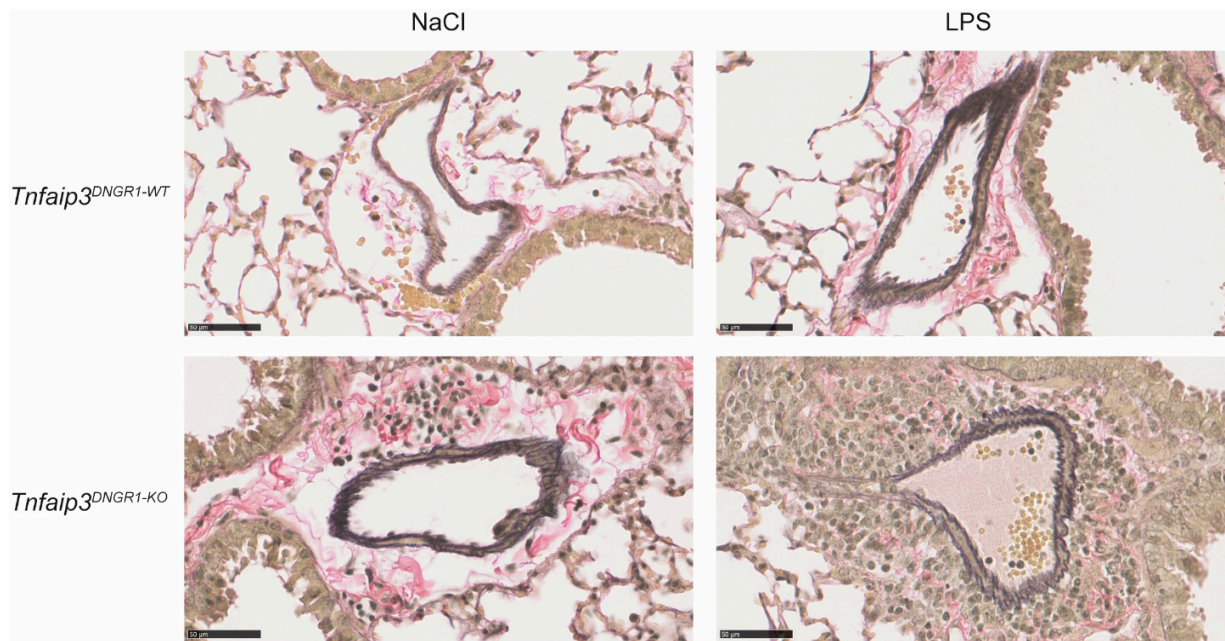

**Supplementary Figure S3.** LPS-exposure in WT and *Tnfaip3*<sup>DNGR1-KO</sup> mice leads to thickening of vessels. Elastin van Gieson (EvG) staining in lung tissue of saline- and LPS-exposed WT and *Tnfaip3*<sup>DNGR1-KO</sup> mice showing thickening of mid-sized vessels. Data shown are representative for 4-6 mice per group.

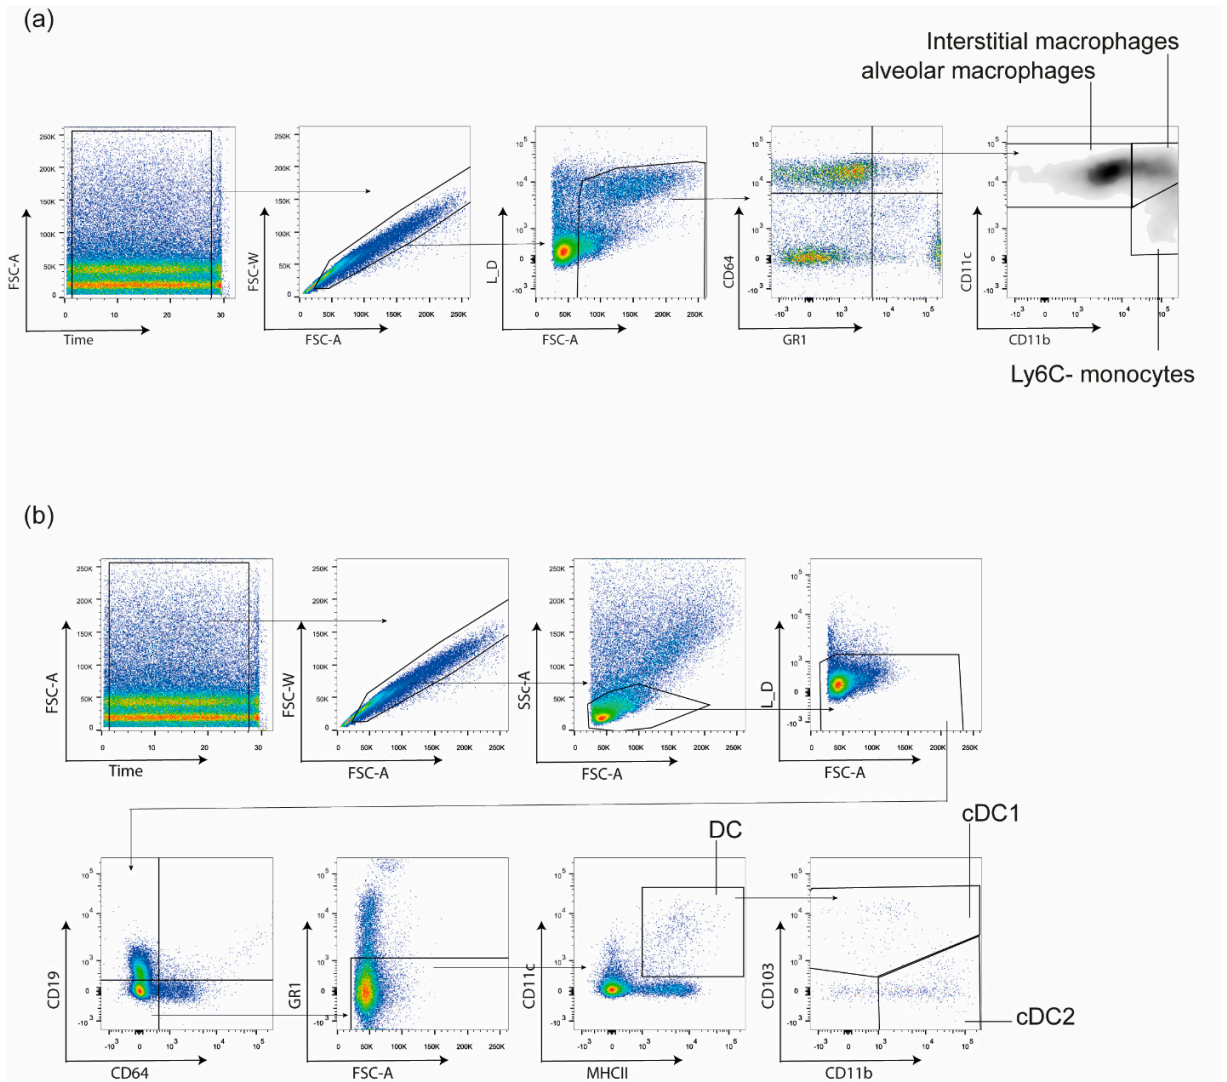

**Supplementary Figure S4.** Gating strategy for lung myeloid cell populations. (a) Flow cytometric gating of lung macrophages and Ly6C- monocytes; (b) flow cytometric gating strategy of cDC subsets in the lung.

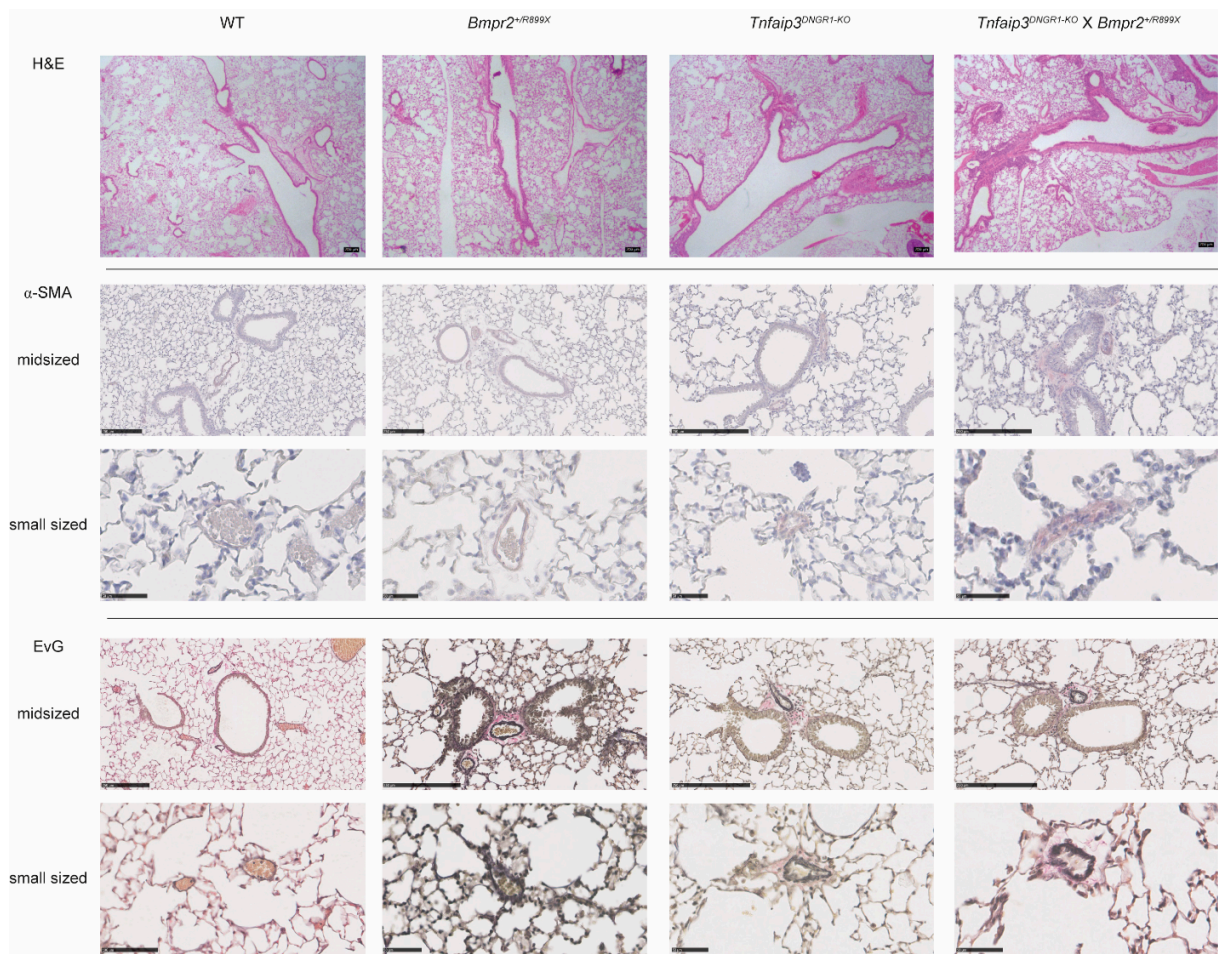

**Supplementary Figure S5.** Remodeling of small and mid-sized vessels in *Tnfaip3*<sup>DNGR1-KO</sup>, *Bmpr2*<sup>+/*R899X*</sup> and *Tnfaip3*<sup>DNGR1-KO</sup> X *Bmpr2*<sup>+/*R899X*</sup>. Hematoxylin and eosin (H&E), smooth muscle actin staining ( $\alpha$ -SMA) and Elastin van Gieson (EvG) staining in lung tissue of WT, *Bmpr2*<sup>+/*R899X*</sup>, *Tnfaip3*<sup>DNGR1-KO</sup> and *Bmpr2*<sup>+/*R899X*</sup> X *Tnfaip3*<sup>DNGR1-KO</sup> mice. Data shown are representative for 6-8 mice per group.

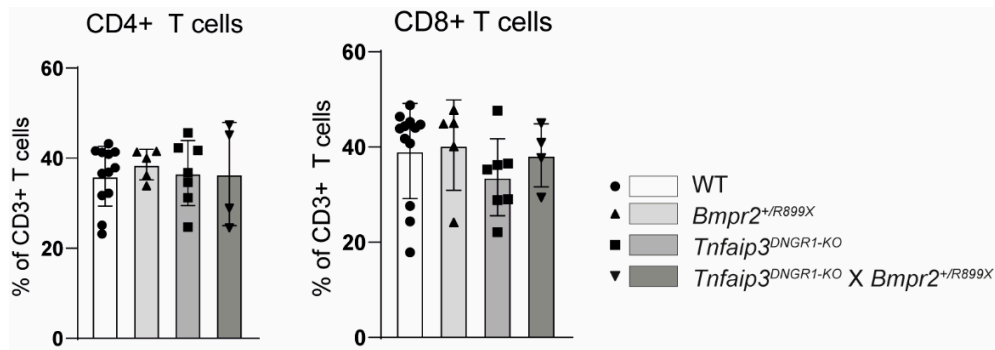

**Supplementary Figure S6.** Proportions of CD4+ T cells and CD8+ T cells are similar between WT, *Tnfaip3*<sup>*DNGR1-KO*</sup>, *Bmpr2*<sup>+/*R899X*</sup> and *Tnfaip3*<sup>*DNGR1-KO*</sup> X *Bmpr2*<sup>+/*R899X*</sup> mice. Quantification of CD4+ T cells and CD8+ T cells (as proportions of total CD3+ T cells) in the lungs of the indicated mouse groups, determined by flow cytometry. Results are presented as mean + standard deviation of 4 – 12 mice per group.

**Supplementary Table S1.** RT-PCR primers.

| <b>Primer</b> | <b>Sequence</b>      |
|---------------|----------------------|
| CD11c FW      | GGCTGCAAGCATCATTCGTT |
| CD11c RW      | AGCCTTCCCCTGGTTCCATA |
| BATF3 FW      | CTTTGTGCAGCTTCGGTCAG |
| BATF3 RW      | GTGTGCAAACCAAGGTTCCG |
| CD4 FW        | CCAGCTGTCTGCTTGGATCA |
| CD4 RW        | GCCCTCTCGTAAACTGTGCT |
| CD8 FW        | GTTCCAGTTTCGGGGTCCAT |
| CD8 RW        | CACCAGTCAGTGAGGGTTCC |
| RQ GAPDH FW   | TTCACCACCATGGAGAAGGC |
| RQ GAPDH RW   | GGCATGGACTGTGGTCATGA |

**Supplementary Table S2.** Monoclonal antibodies used for histology.

| <b>Antibody</b>  | <b>Type</b>        | <b>Clone</b> | <b>Company</b>          |
|------------------|--------------------|--------------|-------------------------|
| $\alpha$ -SMA-PE | Mouse anti-human   | IA4          | R&D                     |
| CD11c PE         | Hamster anti-mouse | N418         | ThermoFisher scientific |
| CD3 APC-ef780    | Rat anti-mouse     | 17A2         | ThermoFisher scientific |
| CD8 Fite         | Rat anti-mouse     | 53-6.7       | BD                      |
| CD8              | Rabbit anti-human  | SP57         | Ventana                 |
| CD68             | Mouse anti-human   | KP1          | Ventana                 |
| CD206            | Mouse anti-human   | 685645       | R&D                     |
| $\alpha$ -Sma    | Mouse anti-human   | 1A4          | Ventana                 |
| MHCII-bio        | Rat anti-mouse     | MRC OX-6     | Abcam                   |
| GFP              | Rabbit anti-GFP    | polyclonal   | Abcam                   |

**Supplementary Table S3.** Monoclonal antibodies used for flow cytometry.

| <b>Antibody</b> | <b>Conjugate</b> | <b>Clone</b> | <b>Company</b> |
|-----------------|------------------|--------------|----------------|
| CD40            | PE               | 1C10         | eBioscience    |
| CD11c           | PE-TXR           | N418         | Invitrogen     |
| CD11b           | PercCP-Cy5.5     | M1/70        | BD             |
| GR1             | PE-Cy7           | RB6.8C5      | eBioscience    |
| CD64            | AF647            | X54-5/7.1    | BD             |
| MHCII           | AF700            | M5/114.15.3  | eBioscience    |
| CD19            | APC-Cy7          | 1D3          | BD             |
| CD103           | eF450            | 2E7          | eBioscience    |
| CD86            | BV650            | FUN1         | BD             |
| PD-L1           | BV711            | MIH5         | BD             |
| CD8             | Fite             | 53-6.7       | eBioscience    |

|              |             |             |             |
|--------------|-------------|-------------|-------------|
| CD19         | PerCP-Cy5   | eBio1D3     | eBioscience |
| CD3          | APC-Cy7     | 17A2        | eBioscience |
| KI-67        | FITC        | SolA15      | eBioscience |
| CD25         | PercP-Cy5.5 | PC61        | BD          |
| CD8          | Pe-Cy7      | 53-6.7      | eBioscience |
| CD62L        | APC         | MEL-14      | eBioscience |
| FOXP3        | AF700       | FJK-16s     | eBioscience |
| CD3          | BV421       | 145-2c11    | BD          |
| CD44         | BV650       | IM7         | BD          |
| CD4          | BV711       | RM4-5       | BD          |
| MHCII        | Biotine     | M5/114.15.2 | eBioscience |
| Streptavidin | BV786       |             | BD          |
| CD45         | PerCP-Cy5.5 | 30-F11      | eBioscience |
| CD19         | APC         | 1D3         | BD          |
